# Supplementary material
Source: PubMed Central journal article supplement (PMC2553758)

Figure 1, Supplemental Figure

Figure 1A

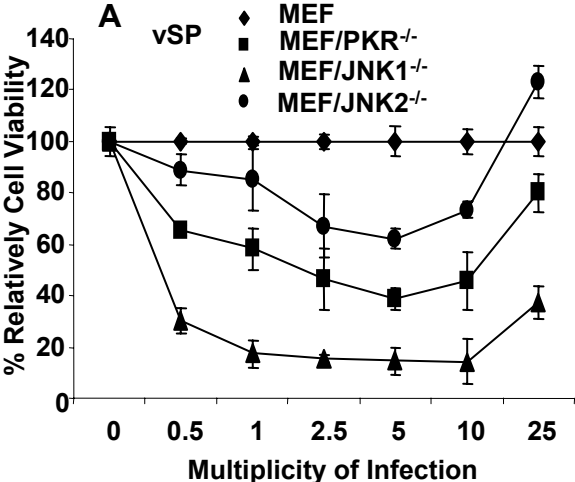

Figure 1C

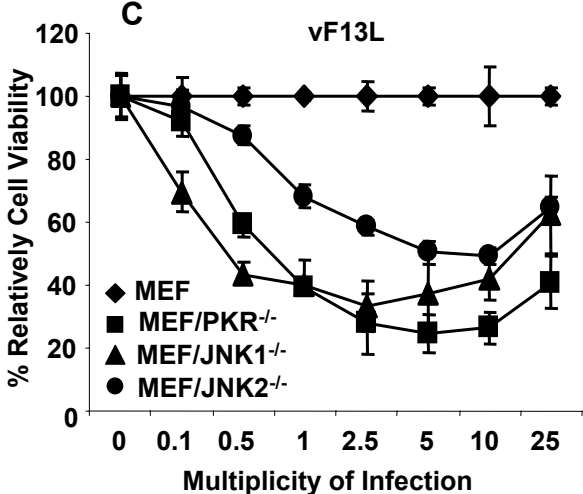

Supplement: NIHMS65638-supplement-1.pdf [file NIHMS65638-supplement-1.pdf]
